# Supplementary material for: Cu2−xSe nanoparticles (Cu2−xSe NPs) mediated neurotoxicityviaoxidative stress damage in PC-12 cells and BALB/c mice
Source: Royal Society of Chemistry journal article supplement (doi:10.1039/c9ra06245a), 2019-01-01
Supplement: c9ra06245a1.pdf [file c9ra06245a1.pdf]

### Supplementary Figures



**Fig. S1†** The  $\zeta$ -potential change in distilled water and physiological saline was detected by electrophoretic mobility measurements (Malvern, Worcestershire, UK) at room temperature daily for a week. Data are expressed as the mean  $\pm$  SD (n = 3).
